# Supplementary material for: Stress-impaired transcription factor expression and insulin secretion in transplanted human islets
Source: JCI journal article supplement (doi:10.1172/jci83657), 2016-04-10
Supplement: sd1 [file 1]

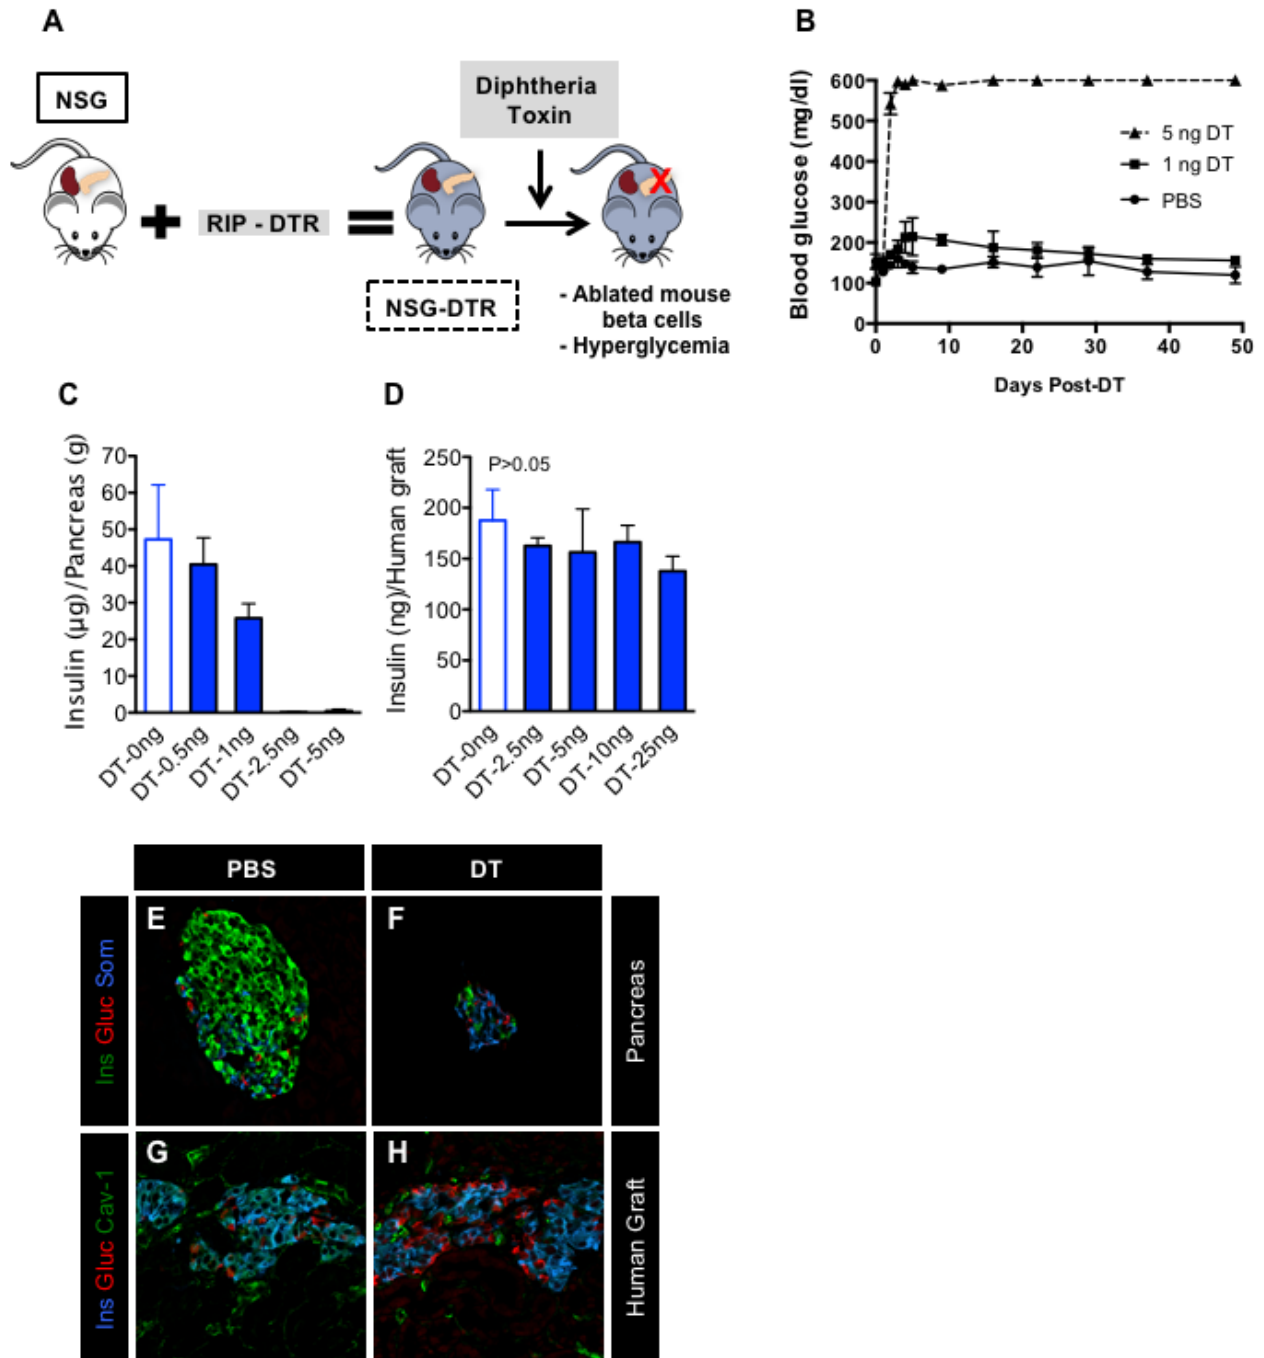

**Figure S1. Establishment of chronic hyperglycemia model (NSG-DTR).** (A) Breeding of NSG mouse with RIP- DTR transgenic mouse yields NSG- DTR mouse. Injection of diphtheria toxin ablates mouse  $\beta$  cells and results in hyperglycemia. (B) Blood glucose values of NSG-DTR mice in response to a single injection of 5ng DT, 1ng DT, or PBS. (C) Pancreatic insulin content of NSG-DTR mice (no human islets) injected with different DT doses (n= 3). (D) Human graft insulin content after injection with different DT doses (n=3). Representative images of NSG-DTR pancreata or human grafts after treatment with PBS (E, G) or DT (F, H). (E-F) Green = insulin, red = glucagon, blue = somatostatin. (G, H) Blue = insulin, red = glucagon, green = caveolin-1.

## NSG High Fat Diet Model (12 weeks diet)

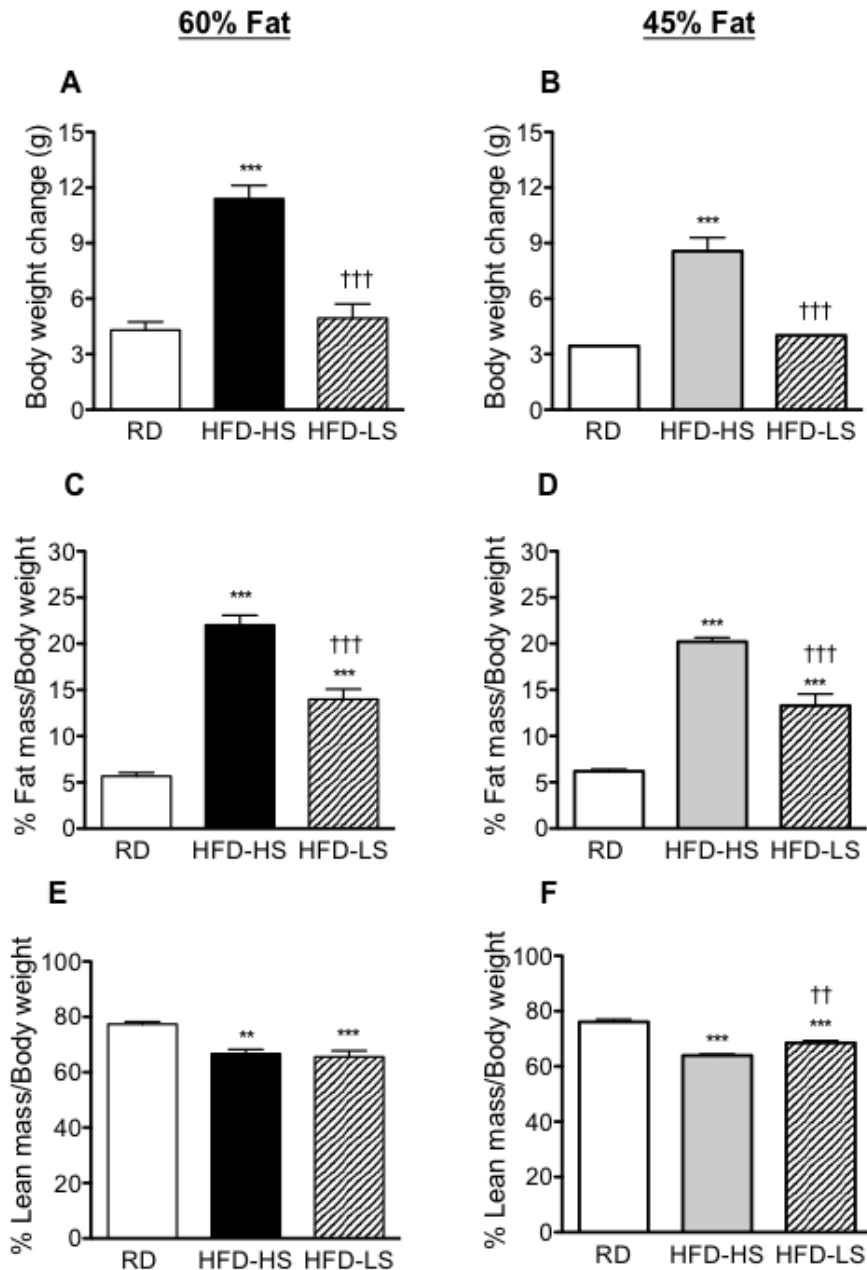

**Figure S2. Feeding with either 60% or 45% of high fat diet (HFD) for 12 weeks induces obesity in NSG mice, with some mice more sensitive (high sensitivity-HS) than others (low sensitivity – LS).** (A, B) Mouse body weight change is higher on HFD (A. RD, n=8; 60% HFD-HS, n=14, 60% HFD-LS, n=6; B. RD, n=10, 45% HFD-HS, n=10; 45% HFD-LS, n=5). (C-F) Fat mass and lean mass (C, E. RD, n=10; 60% HFD-HS, n=13, 60% HFD-LS, n=5; D, F. RD, n=10, 45% HFD-HS, n=10; 45% HFD-LS, n=5). \*\* p<0.01, \*\*\* p<0.001, HFD vs RD; †† P<0.01, ††† P<0.001, HFD-HS vs HFD-LS. 1-way ANOVA followed by Newman-Keuls Multiple Comparison test was used for statistical significant analysis.

## NSG High Fat Diet Model

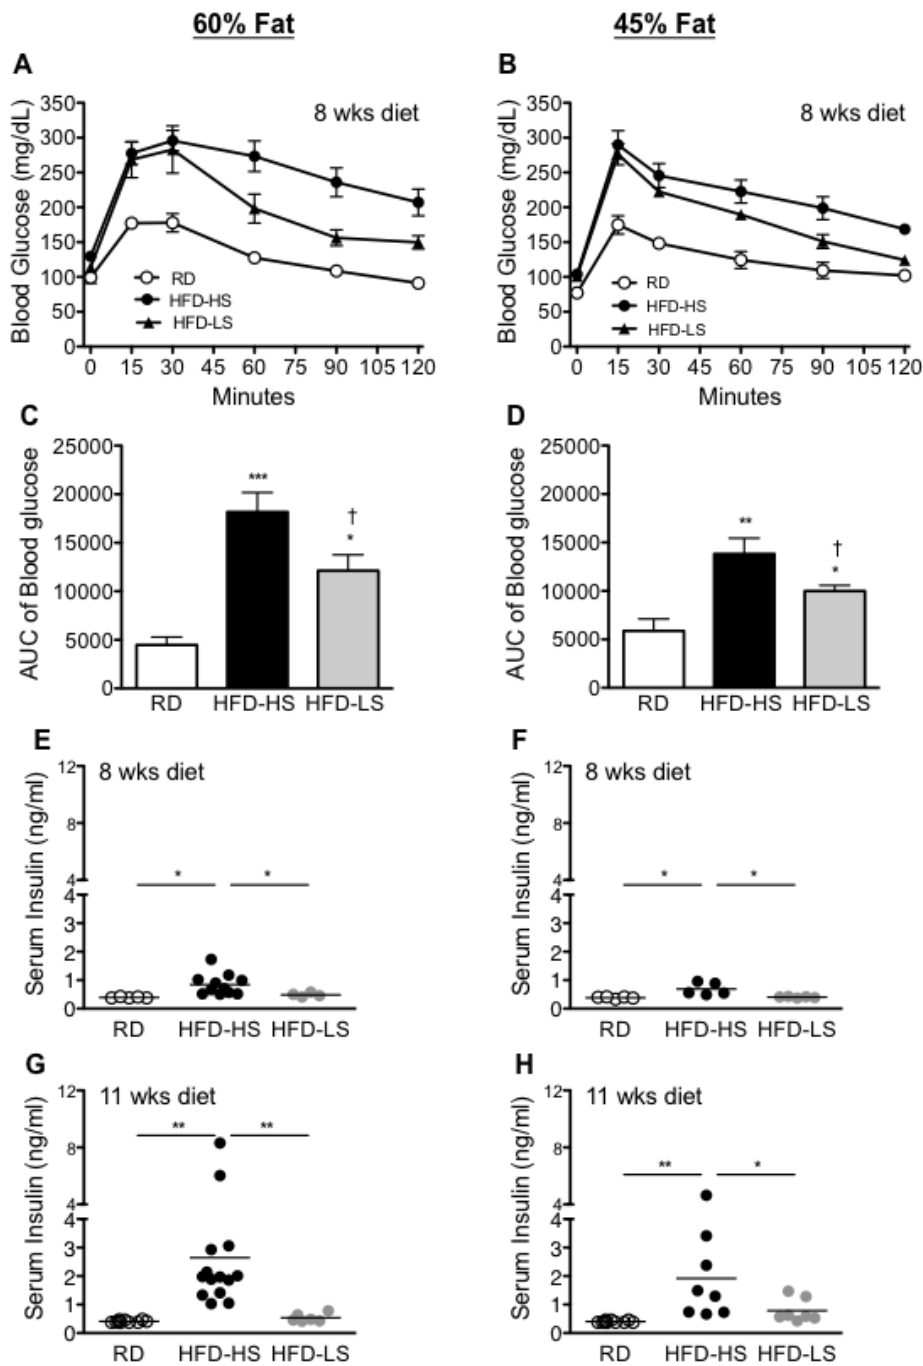

**Figure S3. HFD induces insulin resistance in NSG mice.** (A, B) Eight weeks of 60% or 45% HFD impaired GTT in the NSG mice. However, the mice with 60% HFD had more severely impaired glucose clearance. (RD, n=10; 60% HFD-HS, n=15; 60% HFD-LS, n=5; 45% HFD-HS, n=10; 45% HFD-LS, n=10) (C, D) Blood glucose area under curve of GTT \*\* p<0.01, \*\*\* p<0.001, HFD vs RD; † P<0.05, HFD-HS vs HFD-LS. (E-H) Mouse serum insulin increases in response to 8 weeks (E, F) and 11 weeks (G, H) 60% (E, G) or 45% (F, H) fat diet. \* p<0.05, \*\* p<0.01. No significant difference showed between RD-LS and HFD-LS. 1-way ANOVA followed by Newman-Keuls Multiple Comparison test was used for statistical significant analysis.

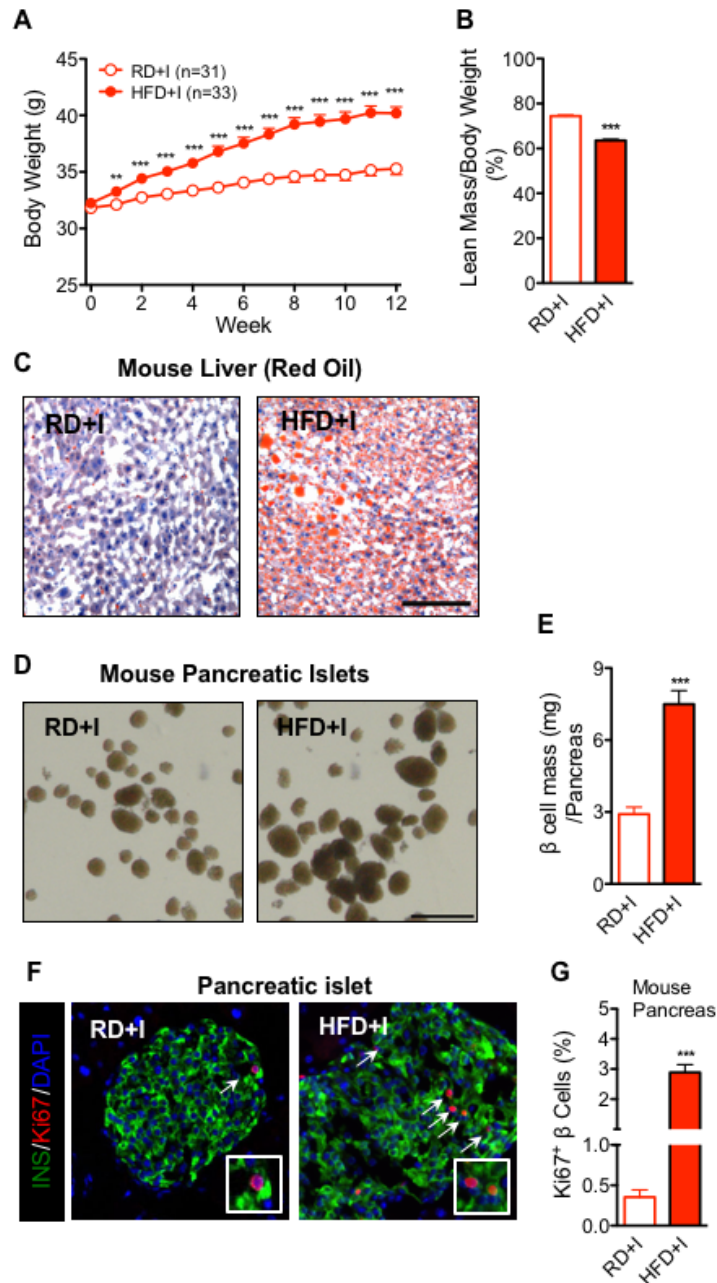

**Figure S4. Greater  $\beta$  cell proliferation and larger mouse islet size in response to HFD.** (A) Body weight in NSG mice with transplanted human islets from day 1 to 12 weeks on RD and HFD. \*\*\*  $p < 0.001$  (B) Lean mass in RD+I and HFD+I. \*\*\*  $p < 0.001$  (C) Dramatically increased lipid deposit in mouse liver after fed with high fat diet for 12 weeks (Oil Red O stain, lipid is red). Scale bar = 250  $\mu$ m and also applies to RD+I. (D) Size of mouse islets in response to 12 weeks of HFD. Islets are from one mouse/each diet. Scale bar = 500  $\mu$ m and also applies to RD+I. (E)  $\beta$  cell mass of mouse pancreas ( $n=4$ /diet group). \*\*\*  $p < 0.001$ . (F) Representative mouse pancreatic islet images. White arrows point to proliferating Ki67-positive cells. (G) Quantification of Ki67-positive  $\beta$  cells in mouse pancreas ( $n=9$ /each diet). The number of  $\beta$  cells counted in each group was 7,000 to 16,000. \*\*\*  $p < 0.001$ . Unpaired 2-tailed Student's *t* test was used for statistical significant analysis.

## NSG Glut4 KO Model

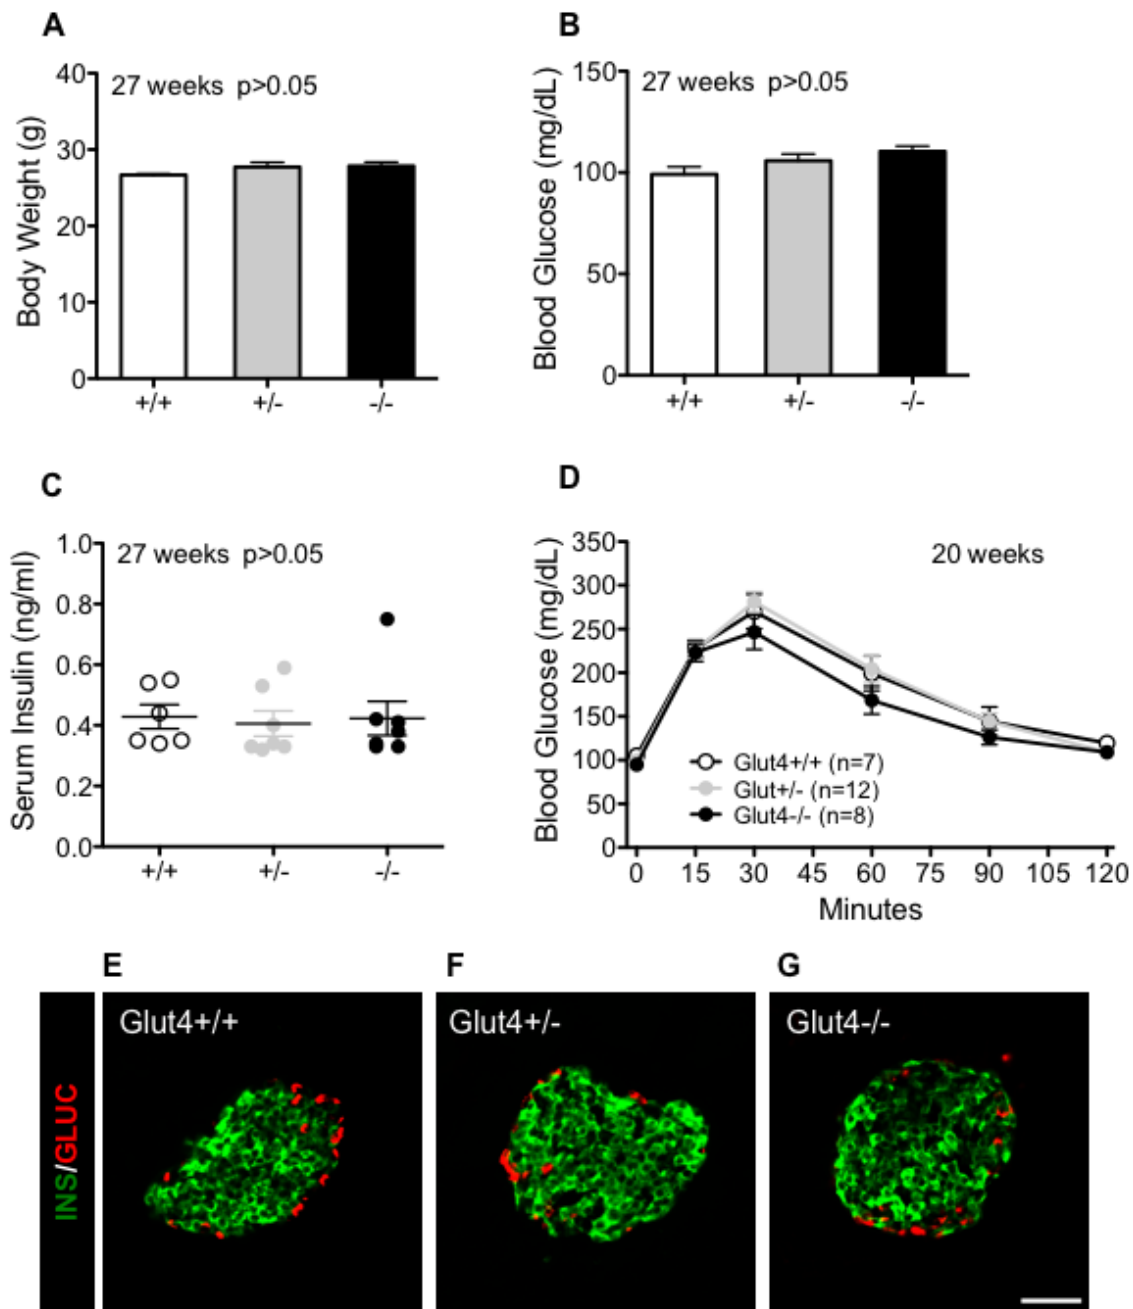

**Figure S5. No phenotype in NSG mice with GLUT4 deficiency.** (A) Body weight, (B) blood glucose (6 hour fast), (C) serum insulin (6 hour fast) in wild type (+/+), heterozygotes (+/-), and homozygotes (-/-) at 27 weeks old.  $n=6-7/genotype/age$ .  $p > 0.05$  (D) GTT at 20 weeks.  $P > 0.05$  at all time points. (E-G) Islet images of three genotypes labeled with insulin (INS, green), glucagon (GLUC, red). Scale bar = 100  $\mu$ m and applies to E and F. 1-way ANOVA followed by Newman-Keuls Multiple Comparison test was used for statistical significant analysis.

## NSG ob/ob Model

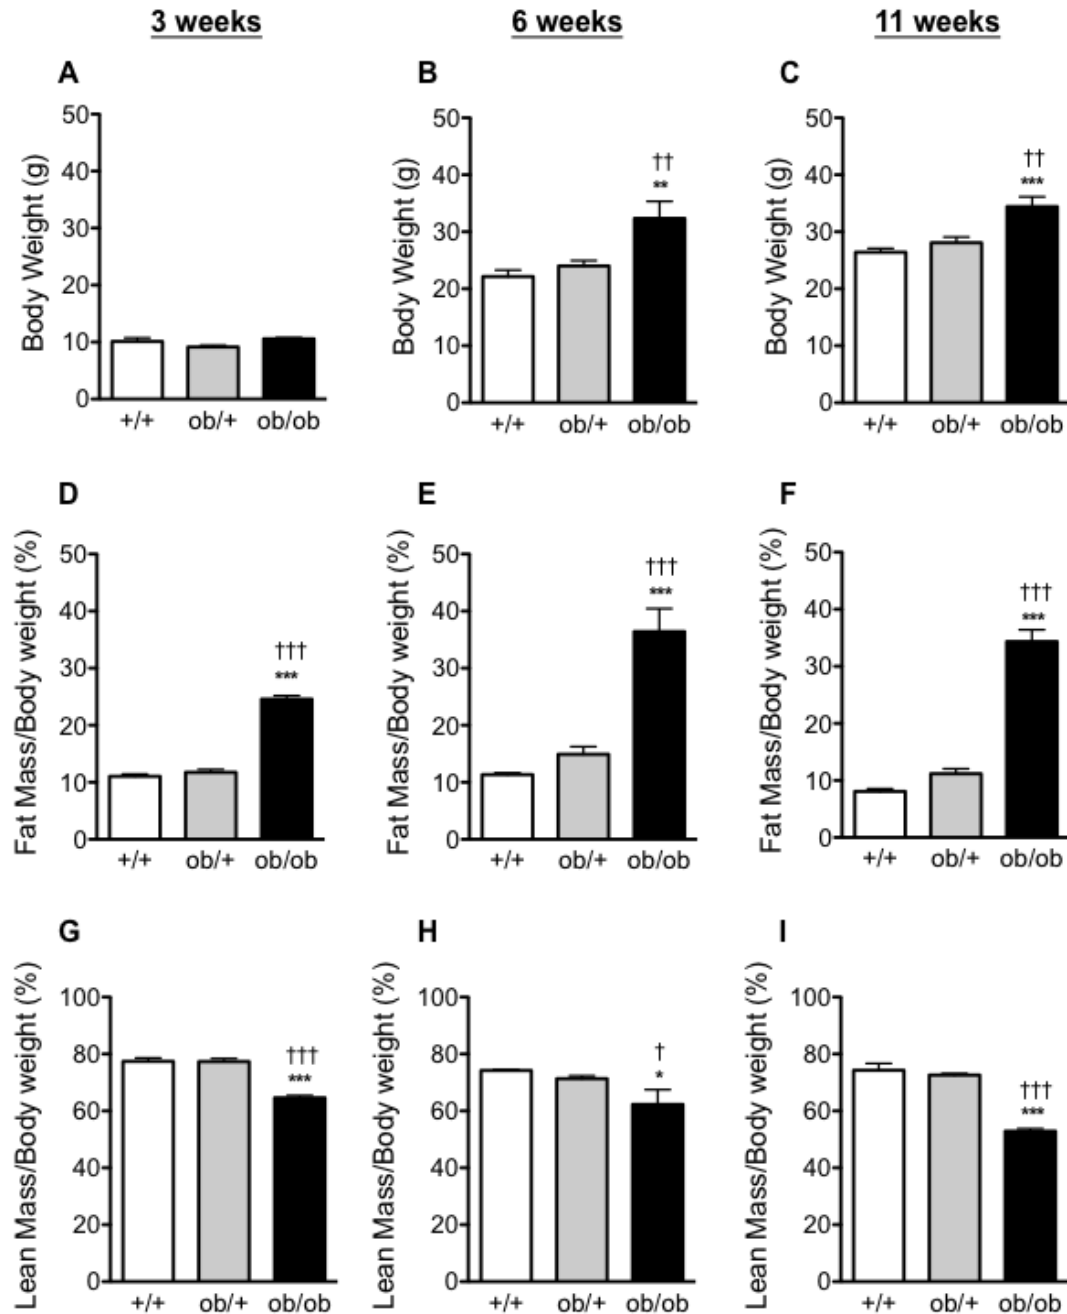

**Figure S6. Leptin deficiency causes obesity in NSG mice.** NSG mice crossed with C57BL/J6 *ob/+* mice and backcrossed for more than 10 generations before study. **(A-C)** Body weight of wild type (+/+), heterozygotes (*ob/+*), and homozygotes (*ob/ob*) at 3, 6, and 11 weeks old. **(D-F)** Fat mass and **(G-I)** lean mass in three genotyping groups at age of 3, 6, and 11 weeks. (3 weeks: n=6, +/+; n=8 (+/ob); n=4, *ob/ob*; 6 weeks: n=5, +/+; n=12, +/ob; n=5, *ob/ob*; 11 weeks: n=15, +/+; n=13, +/ob; n=17, *ob/ob*). \* p<0.05, \*\* p<0.01, \*\*\* p<0.001, *ob/+* and *ob/ob* vs +/+; † p<0.05, †† P<0.01, ††† p<0.001, *ob/+* vs *ob/ob*. 1-way ANOVA followed by Newman-Keuls Multiple Comparison test was used for statistical significant analysis.

## NSG ob/ob Model

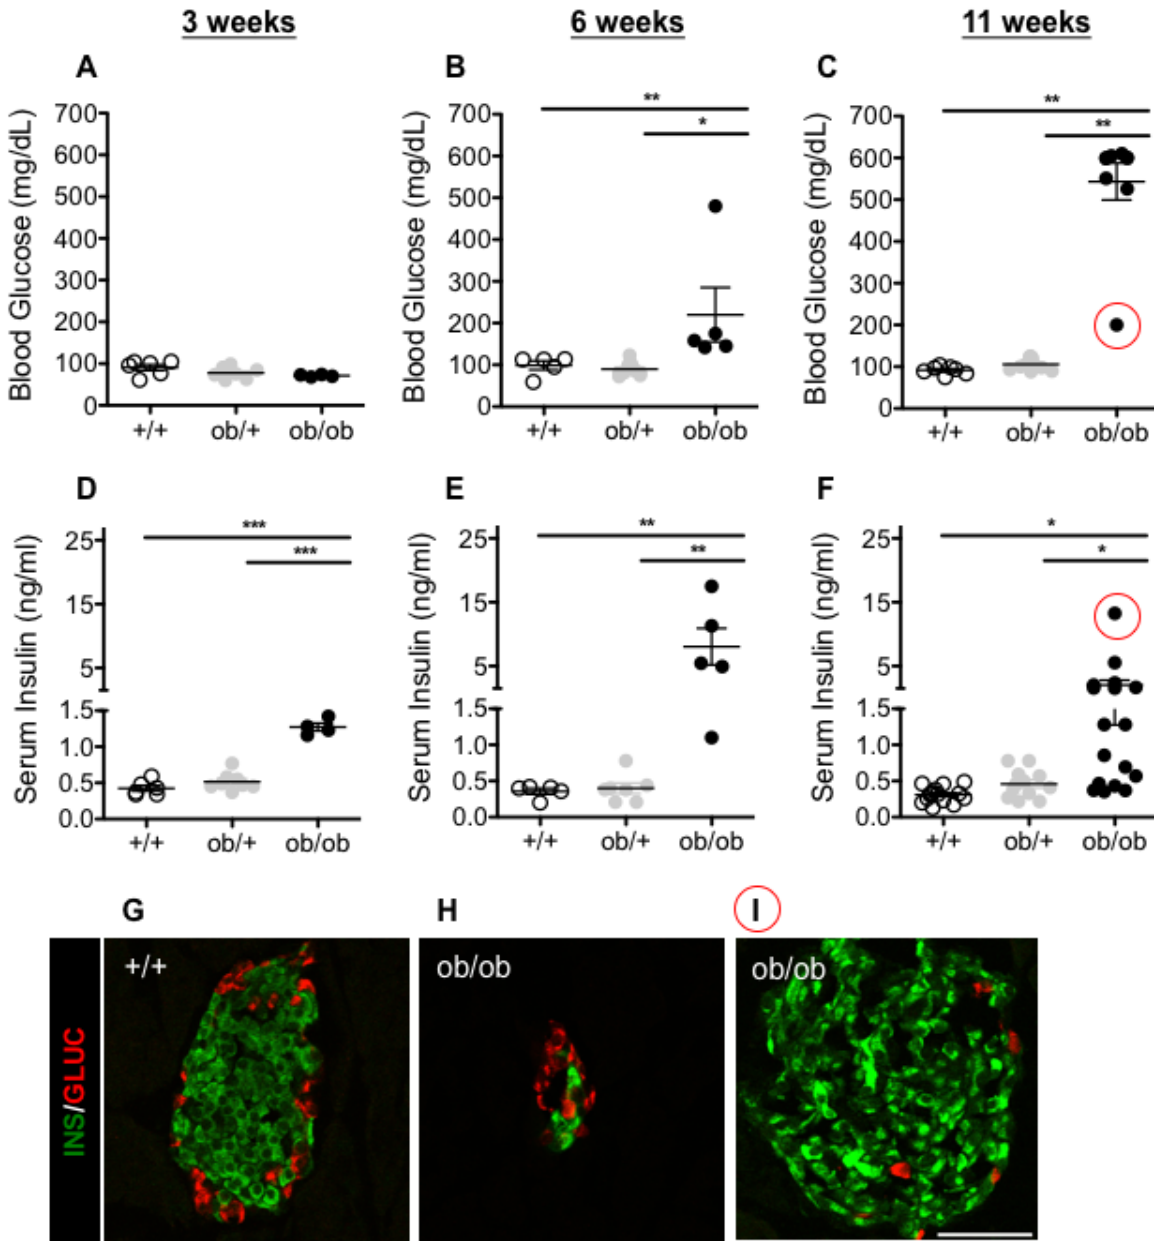

**Figure S7. Diabetes occurs earlier in NSG-ob/ob mice.** (A-C) Blood glucose after fasted for 6 hours. All mice developed to diabetes (glucose > 500mg/dL, except one mouse – 200 mg/dL). (D-F) Serum insulin (fasted) significantly increased at 3 weeks old and was dramatically elevated at 6 weeks. However, at 11 weeks the insulin level declined. (G-I) Images of +/+ and ob/ob islets labeled with insulin (INS, green), glucagon (GLUC, red). In most mice at 11 weeks, islet size and the number of  $\beta$  cells decreases in ob/ob mice while alpha cell number increases (H). Red circles represent the data and islet image (I) from same ob/ob mouse that has higher insulin, lower glucose, and larger islets. 1-way ANOVA followed by Newman-Keuls Multiple Comparison test was used for statistical significant analysis.



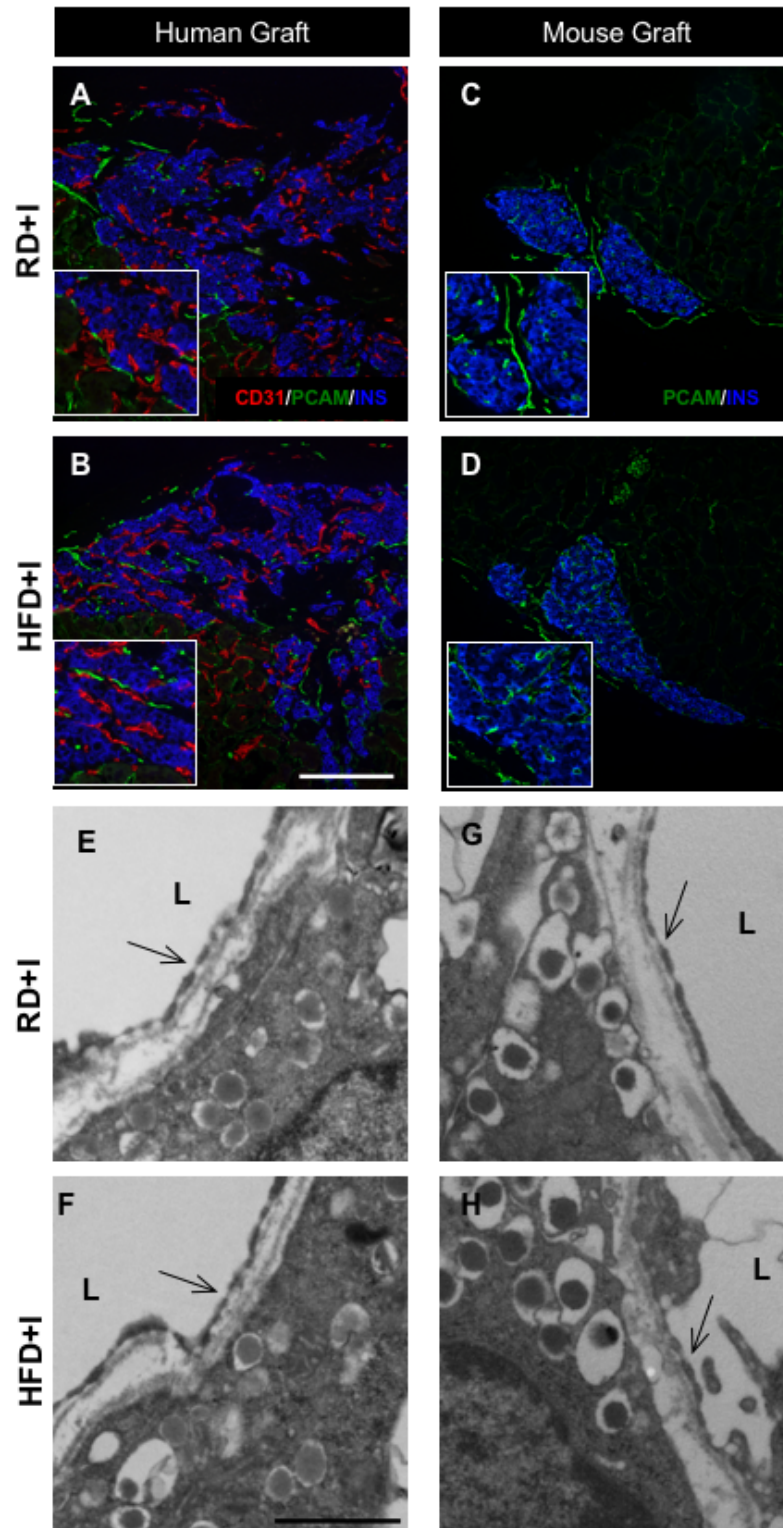

**Figure S8. Graft vasculature does not change in mice on high fat diet.**

Representative images of human (A, B) and mouse grafts (C, D) labeled for insulin (blue), mouse vessels (green), and human vessels (red). Scale bar = 200  $\mu\text{m}$  and applies to A, C, D. Representative EM images of fenestration in human (E, F) and mouse grafts (G, H). Arrows point to fenestration. L = lumen. Scale bar = 1  $\mu\text{m}$  and applies to E-G.



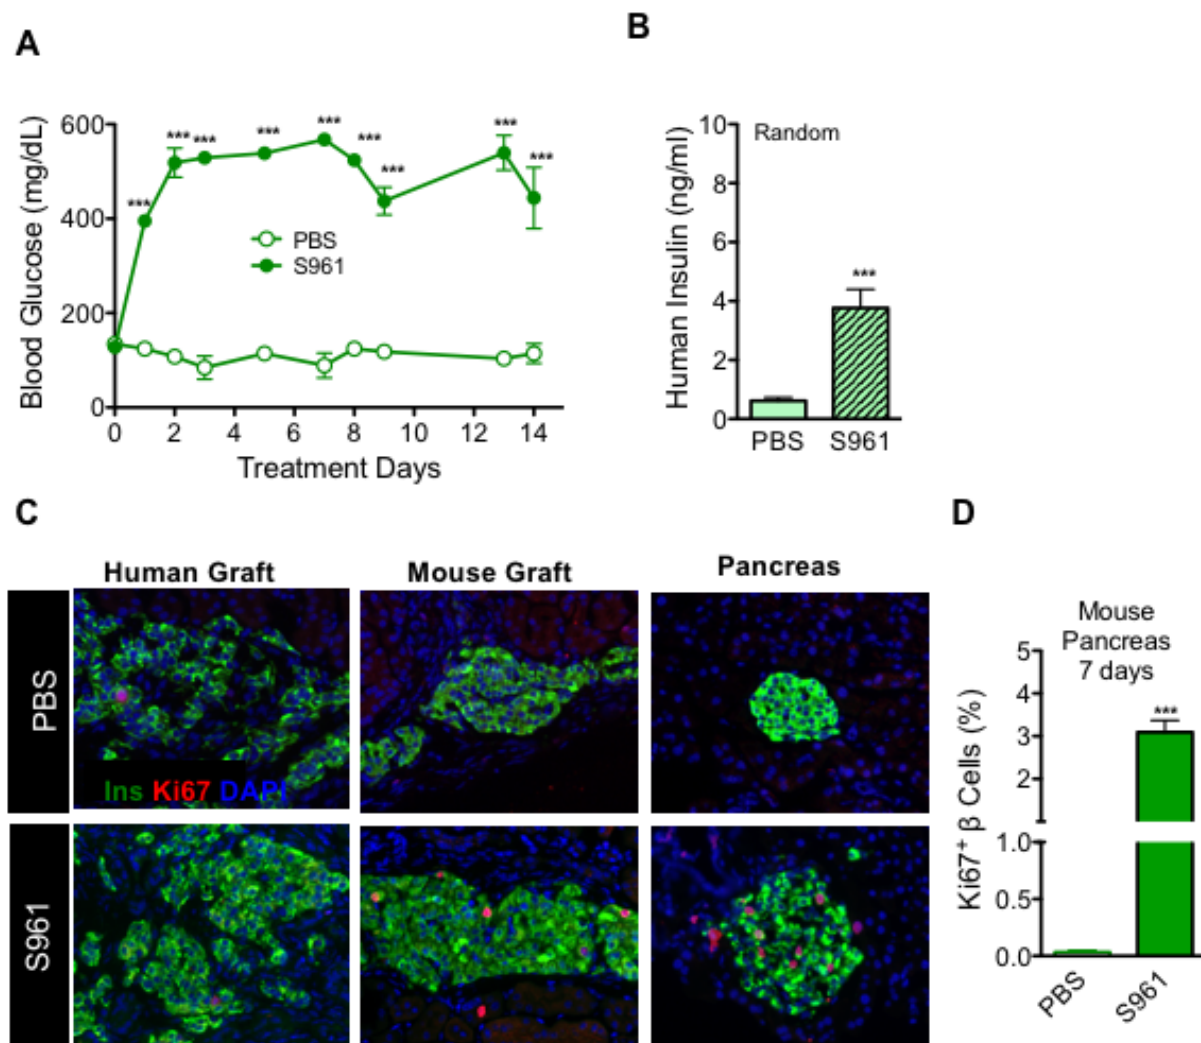

**Figure S9. S961 model of acute hyperglycemia and insulin resistance.** (A) Random blood glucose measurements of S961 and PBS-treated mice. \*\*\*  $p < 0.001$ ,  $n = 4$ /treatment. (B) Random (non-fasting) human insulin values. \*\*\*  $p < 0.001$ , PBS,  $n = 8$ ; S961,  $n = 12$ ). (C) Representative images showing relative levels of  $\beta$  cell proliferation in human graft, mouse graft, and pancreas of S961- or PBS-treated mice. Green = insulin, red = Ki67, blue = DAPI. (D) Quantification of  $\beta$  cell proliferation in mouse pancreata 7 days after S961 injection. \*\*\*  $p < 0.001$ ,  $n = 5$ /treatment. Unpaired 2-tailed Student's  $t$  test was used for statistical significant analysis.

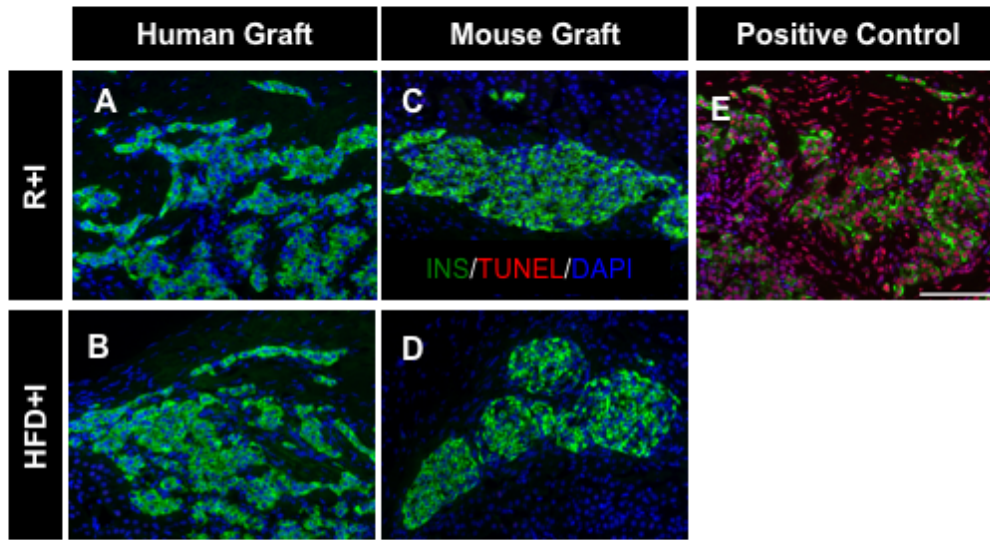

**F**

| NSG-HFD      |     | Total<br>β Cells | TUNEL <sup>+</sup><br>β Cells |
|--------------|-----|------------------|-------------------------------|
| Human Grafts | RD  | 10860            | 0                             |
|              | HFD | 11135            | 1                             |
| Mouse Grafts | RD  | 1455             | 0                             |
|              | HFD | 1444             | 0                             |

**G**

| NSG-DTR      |       | Total<br>β Cells | TUNEL <sup>+</sup><br>β Cells |
|--------------|-------|------------------|-------------------------------|
| Human Grafts | PBS   | 4943             | 1                             |
|              | DT-NG | 2931             | 1                             |
|              | DT-HG | 3767             | 1                             |

**Figure S10. Chronic hyperglycemia and insulin resistance do not increase β cell apoptosis.** Representative images showing lack of TUNEL-positive β cells in NSG+HFD (A, B) human grafts and (C, D) mouse grafts, compared to a positive control. Scale bar = 100 μm and applies to A-D. (E) Tabulated quantification of TUNEL+ β cells in NSG+HFD (F) and NSG-DTR (G) models.

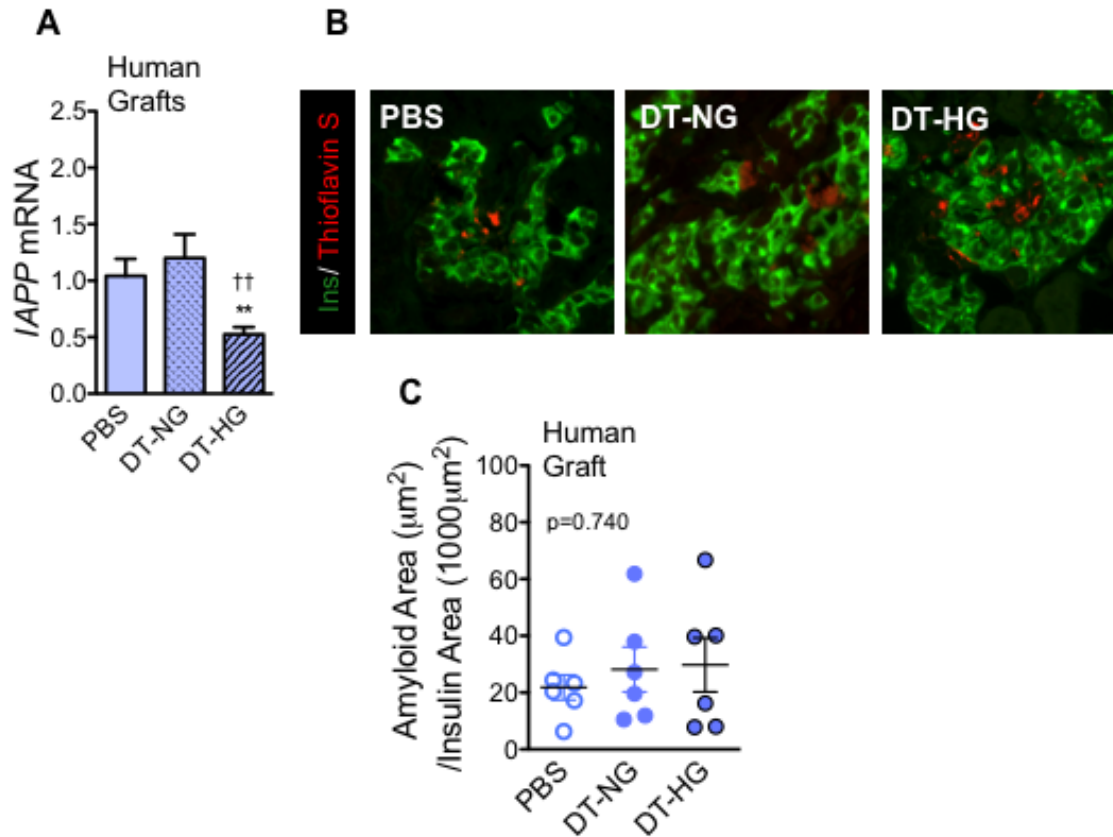

**Figure S11. Islet amyloid is not increased by chronic hyperglycemia. (A)** mRNA levels of islet amyloid polypeptide (IAPP) in human grafts from DTR mice (n=3-6/group). \*\*  $p < 0.01$  vs PBS group, ††  $p < 0.01$  vs DT-NG group. **(B)** Representative images of thioflavin S (red) staining in human islet grafts from each group (green = insulin). **(C)** Quantification of amyloid area per graft section (n=6 grafts per group). 1-way ANOVA followed by Newman-Keuls Multiple Comparison test was used for statistical significant analysis.

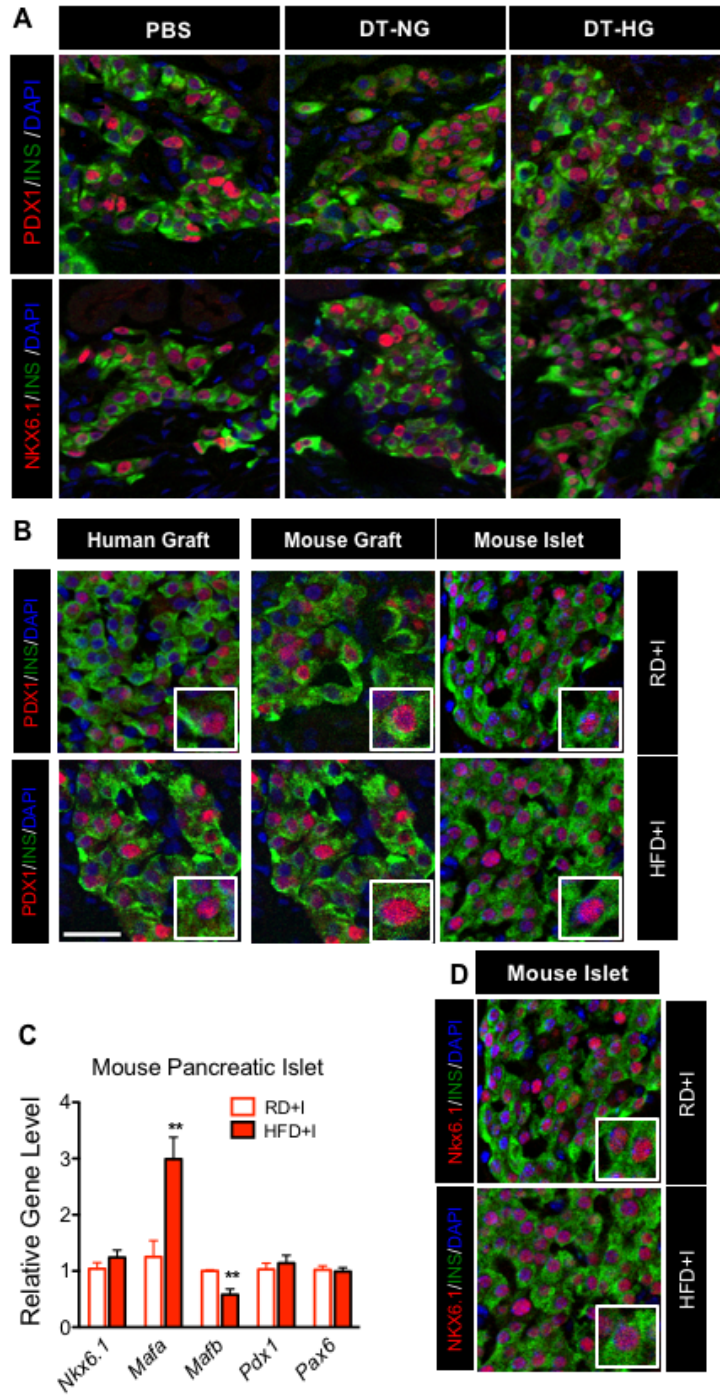

**Figure S12. PDX1 protein level does not change in transplanted human  $\beta$  cells in high fat diet.** (A) Images of PDX1 and NKX6.1 in human grafts of PBS-treated (left panels), DT-NG (center panels), and DT-HG (right panels) mice. (B) Images of PDX1 human grafts (left panels) mouse grafts (center panels), and mouse islets (right panels) in response to RD (top panels) or HFD (bottom panels). Scale bar = 50  $\mu$ m and applies to E. Inserts show an enlargement of  $\beta$  cells. (C) mRNA of transcription factors in mouse islets from NSG-HFD model (n=5/diet, \*\* p<0.01). (D) Images of Nkx6.1 in mouse islets on HFD or RD. Green = insulin, red = PDX1, blue = DAPI. Unpaired 2-tailed Student's *t* test was used for statistical significant analysis.

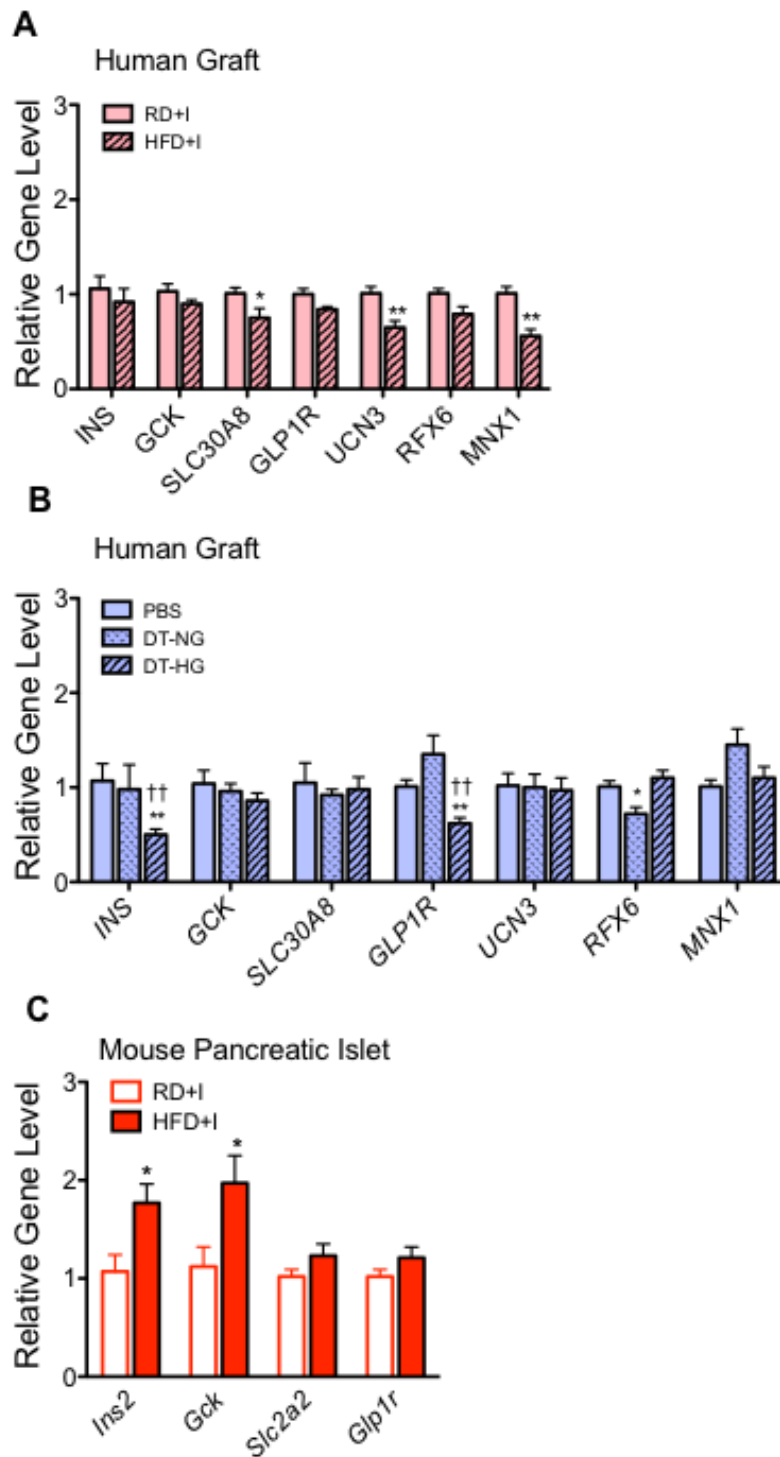

**Figure S13. Expression of glucose-sensing genes is decreased in human grafts.** Expression of glucose metabolism genes in (A) HFD human grafts (n=5/diet), (B) NSG-DTR human grafts (n=4-5/group), and (C) HFD mouse islets (n=5/diet). \* p<0.05, \*\* p<0.01, \*\*\* p<0.001 RD+I vs HFD+I; DT vs PBS, †† p<0.01 vs DT-NG. Unpaired 2-tailed Student's *t* test or 1-way ANOVA followed by Newman-Keuls Multiple Comparison test (B) was used for statistical significant analysis.

**Supplemental Table 1. Islet donor information.**

| Donor | Sex | Age | BMI  | Ischemia time (h) | Cause of death |
|-------|-----|-----|------|-------------------|----------------|
| 1     | F   | 40  | 28.4 | 7.9               | N/A            |
| 2     | M   | 50  | 29.1 | 10.4              | N/A            |
| 3     | F   | 20  | 24.6 | 8.1               | Anoxia         |
| 4     | F   | 51  | 21.2 | 9.3               | Stroke         |
| 5     | M   | 60  | 24.5 | N/A               | N/A            |
| 6     | F   | 27  | 23.9 | 16.8              | Anoxia         |
| 7     | M   | 19  | 26.9 | N/A               | Head Trauma    |
| 8     | M   | 21  | 28.4 | 14.5              | Anoxia         |
| 9     | M   | 26  | 31.0 | 7.8               | Anoxia         |
| 10    | M   | 43  | 29.6 | 5.8               | Head Trauma    |
| 11    | N/A | 46  | N/A  | N/A               | N/A            |
| 12    | M   | 25  | 35.7 | N/A               | Anoxia         |
| 13    | M   | 43  | 24.0 | N/A               | CVA            |

**Supplemental Table 2. PCR primers.**

| <b>Gene Symbol</b> | <b>Catalog #</b> | <b>Gene Symbol</b> | <b>Catalog #</b> |
|--------------------|------------------|--------------------|------------------|
| <i>INS</i>         | Hs02741908_m1    | <i>Ins2</i>        | Mm00731595_gh    |
| <i>GCK</i>         | Hs01564555_m1    | <i>Gck</i>         | Mm00439129_m1    |
| <i>SLC2A1</i>      | Hs00892681_m1    |                    |                  |
| <i>SLC2A2</i>      | Hs01096904_m1    | <i>Slc2a2</i>      | Mm00446229_m1    |
| <i>GLP1R</i>       | Hs00157705_m1    | <i>Glp1r</i>       | Mm00445292_m1    |
| <i>BID</i>         | Hs00609632_m1    | <i>Bid</i>         | Mm00626981_m1    |
| <i>BAD</i>         | Hs00188930_m1    | <i>Bad</i>         | Mm00432042_m1    |
| <i>DDIT3</i>       | Hs00358796_g1    | <i>Ddit3</i>       | Mm00492097_m1    |
| <i>SOD1</i>        | Hs00533490_m1    |                    |                  |
| <i>SOD2</i>        | Hs00167309_m1    |                    |                  |
| <i>CAT</i>         | Hs00156308_m1    |                    |                  |
| <i>GPX1</i>        | Hs00829989_gH    |                    |                  |
| <i>UCP2</i>        | Hs01075225_m1    |                    |                  |
| <i>NFE2L2</i>      | Hs00975961_g1    |                    |                  |
| <i>HSPA5</i>       | Hs00607129_gH    | <i>Hspa5</i>       | Mm00517690_g1    |
| <i>HSP90B1</i>     | Hs00427665_g1    | <i>Hsp90b1</i>     | Mm00441926_m1    |
| <i>PDIA4</i>       | Hs01115905_m1    | <i>Pdia4</i>       | Mm00437958_m1    |
| <i>IAPP</i>        | Hs00169095_m1    | <i>Iapp</i>        | Mm00439403_m     |
| <i>NKX6.1</i>      | Hs00232355_m1    | <i>Nkx6.1</i>      | Mm00454961_m1    |
| <i>MAFA</i>        | Hs01651425_s1    | <i>Mafa</i>        | Mm00845206_s1    |
| <i>MAFB</i>        | Hs00534343_s1    | <i>Mafb</i>        | Mm00627481_s1    |
| <i>PDX1</i>        | Hs00236830_m1    | <i>Pdx1</i>        | Mm00435565_m1    |
| <i>FOXO1</i>       | Hs01054576_m1    | <i>Foxo1</i>       | Mm00490672_m1    |
| <i>ACTB</i>        | Hs99999903_m1    | <i>Actb</i>        | Mm00607939_s1    |
| <i>TFRC</i>        | Hs99999911_m1    | <i>Tfrc</i>        | Mm00441941_m1    |
| <i>TBP</i>         | Hs99999910_m1    | <i>Tbp</i>         | Mm00446971_m1    |
| <i>G6PC2</i>       | Hs01549773_m1    |                    |                  |
| <i>G6PD</i>        | Hs00166169_m1    |                    |                  |
| <i>AGT</i>         | Hs01586213_m1    |                    |                  |
| <i>PRKAA1</i>      | Hs01562315_m1    |                    |                  |
| <i>SLC30A8</i>     | Hs00545183_m1    |                    |                  |
| <i>UCN3</i>        | Hs00846499_s1    |                    |                  |
| <i>RFX6</i>        | Hs00543100_m1    |                    |                  |
| <i>MNX1</i>        | Hs00907365_m1    |                    |                  |
